# Supplementary material
Source: Springer Nature journal article supplement (https://www.springermedizin.de/resource/supplementary/12890_2012_360_MOESM6_ESM.pdf/9505062)

**Total daily dose = 25  $\mu\text{g}$** 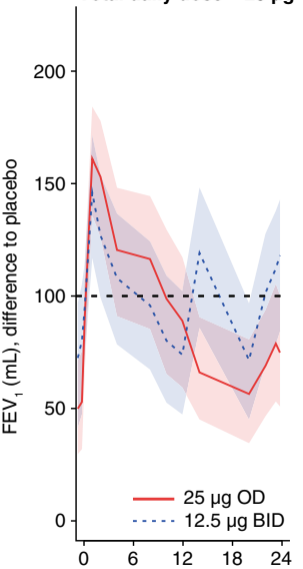**Total daily dose = 50  $\mu\text{g}$** 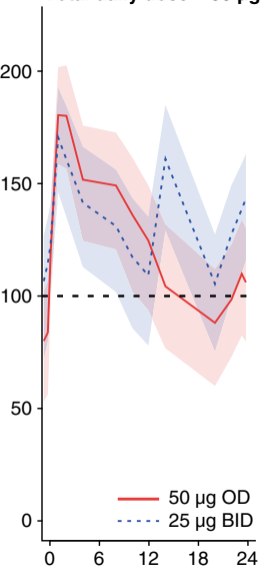**Total daily dose = 100  $\mu\text{g}$** 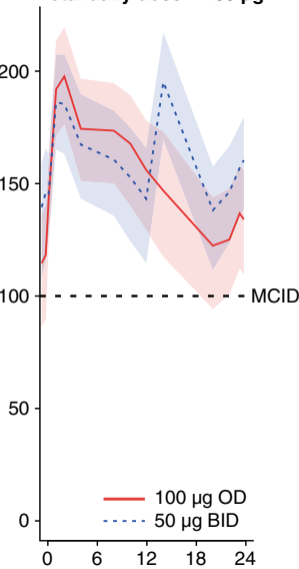

Supplement: MOESM6 [file 9505062]
